# Supplementary material for: Bovine viral diarrhea virus in free-ranging wild ruminants in Switzerland: low prevalence of infection despite regular interactions with domestic livestock
Source: PubMed Central journal article supplement (PMC3514304; doi:10.1186/1746-6148-8-204), 2012-10-29
Supplement: 1746-6148-8-204-S3.pdf [file 1746-6148-8-204-S3.pdf]

**Additional file 3: Interactions between Alpine ibex and cervids.** Numbers refer to the number of game-wardens having reported the corresponding observation, i.e., number of analyzed questionnaires (N total) and reported frequency of observations (1: never observed; 2: observed no more than once per year; 3: observed more than once per year).

| <b>IBEX - ROE DEER</b>                         | <b>N total</b> | <b>Reported frequency of observation</b> |          |          |
|------------------------------------------------|----------------|------------------------------------------|----------|----------|
|                                                |                | <b>1</b>                                 | <b>2</b> | <b>3</b> |
| <b>Proximity between species</b>               |                |                                          |          |          |
| Physical contact                               | 35             | 35                                       | 0        | 0        |
| Encounter of less than 50 m                    | 35             | 24                                       | 8        | 3        |
| Encounter of more than 50 m                    | 35             | 21                                       | 7        | 7        |
| Non-simultaneous occupation of the same area   | 35             | 18                                       | 8        | 9        |
| <b>Duration of encounters</b>                  |                |                                          |          |          |
| Encounters of less than 50 m for more than 1 h | 35             | 28                                       | 7        | 0        |
| <b>Type of interactions</b>                    |                |                                          |          |          |
| Mixing of herds when grazing                   | 35             | 30                                       | 4        | 1        |
| Use of the same natural feeding resources      | 35             | 19                                       | 14       | 2        |
| Use of the same same salt lick                 | 35             | 28                                       | 7        | 0        |
| Use of the same same resting places            | 35             | 33                                       | 1        | 1        |
| <b>Anthropogenic food sources</b>              |                |                                          |          |          |
| Wildlife supplemental feeding                  | 45             | 45                                       | 0        | 0        |
| Livestock food sources                         | 45             | 45                                       | 0        | 0        |
| Other food sources on private grounds          | 45             | 45                                       | 0        | 0        |
| <b>IBEX - RED DEER</b>                         |                |                                          |          |          |
|                                                | <b>N total</b> | <b>Reported frequency of observation</b> |          |          |
|                                                |                | <b>1</b>                                 | <b>2</b> | <b>3</b> |
| <b>Proximity between species</b>               |                |                                          |          |          |
| Physical contact                               | 35             | 35                                       | 0        | 0        |
| Encounter of less than 50 m                    | 35             | 17                                       | 14       | 4        |
| Encounter of more than 50 m                    | 35             | 12                                       | 11       | 12       |
| Non-simultaneous occupation of the same area   | 35             | 12                                       | 16       | 7        |
| <b>Duration of encounters</b>                  |                |                                          |          |          |
| Encounters of less than 50 m for more than 1 h | 35             | 28                                       | 5        | 2        |
| <b>Type of interactions</b>                    |                |                                          |          |          |
| Mixing of herds when grazing                   | 35             | 26                                       | 7        | 2        |
| Use of the same natural feeding resources      | 35             | 10                                       | 10       | 15       |
| Use of the same same salt lick                 | 35             | 18                                       | 10       | 7        |
| Use of the same same resting places            | 35             | 26                                       | 6        | 3        |
| <b>Anthropogenic food sources</b>              |                |                                          |          |          |
| Wildlife supplemental feeding                  | 45             | 45                                       | 0        | 0        |
| Livestock food sources                         | 45             | 45                                       | 0        | 0        |
| Other food sources on private grounds          | 45             | 45                                       | 0        | 0        |
