# Supplementary material for: Bovine viral diarrhea virus in free-ranging wild ruminants in Switzerland: low prevalence of infection despite regular interactions with domestic livestock
Source: PubMed Central journal article supplement (PMC3514304; doi:10.1186/1746-6148-8-204), 2012-10-29
Supplement: 1746-6148-8-204-S4.pdf [file 1746-6148-8-204-S4.pdf]

**Additional file 4: Interactions between roe deer and domestic ruminants.** Numbers refer to the number of game-wardens having reported the corresponding observation, i.e., number of analyzed questionnaires (N) and reported frequency of observations (1: never observed; 2: observed no more than once per year; 3: observed more than once per year).

| ROE DEER with                                  | CATTLE |    |    |    | SHEEP |    |    |    | GOAT |    |    |    |
|------------------------------------------------|--------|----|----|----|-------|----|----|----|------|----|----|----|
|                                                | N      | 1  | 2  | 3  | N     | 1  | 2  | 3  | N    | 1  | 2  | 3  |
| <b>Proximity between species</b>               |        |    |    |    |       |    |    |    |      |    |    |    |
| Physical contact                               | 40     | 39 | 1  | 0  | 38    | 37 | 1  | 0  | 37   | 37 | 0  | 0  |
| Encounter of less than 50 m                    | 40     | 6  | 9  | 25 | 38    | 11 | 13 | 14 | 37   | 13 | 14 | 10 |
| Encounter of more than 50 m                    | 40     | 3  | 5  | 32 | 38    | 8  | 7  | 23 | 37   | 10 | 10 | 17 |
| Non-simultaneous occupation of the same area   | 40     | 3  | 0  | 37 | 38    | 3  | 7  | 28 | 37   | 6  | 6  | 25 |
| <b>Duration of encounters</b>                  |        |    |    |    |       |    |    |    |      |    |    |    |
| Encounters of less than 50 m for more than 1 h | 40     | 16 | 16 | 8  | 38    | 26 | 11 | 1  | 37   | 25 | 12 | 0  |
| <b>Type of interactions</b>                    |        |    |    |    |       |    |    |    |      |    |    |    |
| Mixing of herds when grazing                   | 40     | 13 | 10 | 17 | 38    | 23 | 11 | 4  | 37   | 25 | 10 | 2  |
| Use of the same natural feeding resources      | 40     | 6  | 7  | 27 | 38    | 9  | 7  | 22 | 37   | 10 | 12 | 15 |
| Use of the same same salt lick                 | 40     | 22 | 7  | 11 | 38    | 21 | 9  | 8  | 37   | 23 | 9  | 5  |
| Use of the same same resting places            | 40     | 21 | 11 | 8  | 38    | 27 | 7  | 4  | 37   | 28 | 6  | 3  |
| <b>Anthropogenic food sources</b>              |        |    |    |    |       |    |    |    |      |    |    |    |
| Wildlife supplemental feeding                  | 50     | 49 | 1  | 0  | 49    | 48 | 1  | 0  | 48   | 47 | 1  | 0  |
| Livestock food sources                         | 50     | 31 | 8  | 11 | 49    | 40 | 6  | 3  | 48   | 42 | 4  | 2  |
| Other food sources on private grounds          | 50     | 44 | 5  | 1  | 49    | 47 | 2  | 0  | 48   | 47 | 1  | 0  |
