# Supplementary material for: Bovine viral diarrhea virus in free-ranging wild ruminants in Switzerland: low prevalence of infection despite regular interactions with domestic livestock
Source: PubMed Central journal article supplement (PMC3514304; doi:10.1186/1746-6148-8-204), 2012-10-29
Supplement: 1746-6148-8-204-S5.pdf [file 1746-6148-8-204-S5.pdf]

**Additional file 5: Interactions between red deer and domestic ruminants.** Numbers refer to the number of game-wardens having reported the corresponding observation, i.e., number of analyzed questionnaires (N) and reported frequency of observations (1: never observed; 2: observed no more than once per year; 3: observed more than once per year).

| RED DEER with                                  | CATTLE |    |    |    | SHEEP |    |    |    | GOAT |    |    |    |
|------------------------------------------------|--------|----|----|----|-------|----|----|----|------|----|----|----|
|                                                | N      | 1  | 2  | 3  | N     | 1  | 2  | 3  | N    | 1  | 2  | 3  |
| <b>Proximity between species</b>               |        |    |    |    |       |    |    |    |      |    |    |    |
| Physical contact                               | 40     | 37 | 1  | 2  | 38    | 38 | 0  | 0  | 37   | 37 | 0  | 0  |
| Encounter of less than 50 m                    | 40     | 4  | 15 | 21 | 38    | 12 | 18 | 8  | 37   | 14 | 16 | 7  |
| Encounter of more than 50 m                    | 40     | 3  | 6  | 31 | 38    | 6  | 12 | 20 | 37   | 9  | 13 | 15 |
| Non-simultaneous occupation of the same area   | 40     | 1  | 6  | 33 | 38    | 7  | 9  | 22 | 37   | 10 | 11 | 16 |
| <b>Duration of encounters</b>                  |        |    |    |    |       |    |    |    |      |    |    |    |
| Encounters of less than 50 m for more than 1 h | 40     | 17 | 11 | 12 | 38    | 25 | 10 | 3  | 37   | 26 | 9  | 2  |
| <b>Type of interactions</b>                    |        |    |    |    |       |    |    |    |      |    |    |    |
| Mixing of herds when grazing                   | 40     | 12 | 16 | 12 | 38    | 21 | 10 | 7  | 37   | 25 | 10 | 2  |
| Use of the same natural feeding resources      | 40     | 2  | 4  | 34 | 38    | 6  | 9  | 23 | 37   | 10 | 11 | 16 |
| Use of the same same salt lick                 | 40     | 14 | 12 | 14 | 38    | 18 | 6  | 14 | 37   | 22 | 10 | 5  |
| Use of the same same resting places            | 40     | 16 | 7  | 17 | 38    | 21 | 9  | 8  | 37   | 26 | 6  | 5  |
| <b>Anthropogenic food sources</b>              |        |    |    |    |       |    |    |    |      |    |    |    |
| Wildlife supplemental feeding                  | 50     | 47 | 0  | 3  | 49    | 49 | 0  | 0  | 48   | 48 | 0  | 0  |
| Livestock food sources                         | 50     | 19 | 4  | 27 | 49    | 30 | 9  | 10 | 48   | 36 | 4  | 8  |
| Other food sources on private grounds          | 50     | 44 | 2  | 4  | 49    | 41 | 5  | 3  | 48   | 47 | 1  | 0  |
