# Supplementary material for: Bovine viral diarrhea virus in free-ranging wild ruminants in Switzerland: low prevalence of infection despite regular interactions with domestic livestock
Source: PubMed Central journal article supplement (PMC3514304; doi:10.1186/1746-6148-8-204), 2012-10-29
Supplement: 1746-6148-8-204-S6.pdf [file 1746-6148-8-204-S6.pdf]

**Additional file 6: Interactions between Alpine chamois and domestic ruminants.** Numbers refer to the number of game-wardens having reported the corresponding observation, i.e., number of analyzed questionnaires (N) and reported frequency of observations (1: never observed; 2: observed no more than once per year; 3: observed more than once per year).

| CHAMOIS with                                   | CATTLE |    |    |    | SHEEP |    |    |    | GOAT |    |    |    |
|------------------------------------------------|--------|----|----|----|-------|----|----|----|------|----|----|----|
|                                                | N      | 1  | 2  | 3  | N     | 1  | 2  | 3  | N    | 1  | 2  | 3  |
| <b>Proximity between species</b>               |        |    |    |    |       |    |    |    |      |    |    |    |
| Physical contact                               | 40     | 40 | 0  | 0  | 38    | 37 | 1  | 0  | 37   | 33 | 3  | 1  |
| Encounter of less than 50 m                    | 40     | 10 | 17 | 13 | 38    | 6  | 13 | 19 | 37   | 10 | 12 | 15 |
| Encounter of more than 50 m                    | 40     | 4  | 9  | 27 | 38    | 3  | 4  | 31 | 37   | 6  | 9  | 22 |
| Non-simultaneous occupation of the same area   | 40     | 7  | 7  | 26 | 38    | 2  | 2  | 34 | 37   | 7  | 6  | 24 |
| <b>Duration of encounters</b>                  |        |    |    |    |       |    |    |    |      |    |    |    |
| Encounters of less than 50 m for more than 1 h | 40     | 21 | 10 | 9  | 38    | 14 | 12 | 12 | 37   | 23 | 6  | 8  |
| <b>Type of interactions</b>                    |        |    |    |    |       |    |    |    |      |    |    |    |
| Mixing of herds when grazing                   | 40     | 22 | 7  | 11 | 38    | 19 | 7  | 12 | 37   | 23 | 8  | 6  |
| Use of the same natural feeding resources      | 40     | 6  | 11 | 23 | 38    | 4  | 2  | 32 | 37   | 6  | 7  | 24 |
| Use of the same same salt lick                 | 40     | 13 | 11 | 16 | 38    | 9  | 6  | 23 | 37   | 14 | 6  | 17 |
| Use of the same same resting places            | 40     | 23 | 13 | 4  | 38    | 12 | 8  | 18 | 37   | 15 | 11 | 11 |
| <b>Anthropogenic food sources</b>              |        |    |    |    |       |    |    |    |      |    |    |    |
| Wildlife supplemental feeding                  | 50     | 50 | 0  | 0  | 49    | 49 | 0  | 0  | 48   | 48 | 0  | 0  |
| Livestock food sources                         | 50     | 48 | 2  | 0  | 49    | 45 | 3  | 1  | 48   | 46 | 2  | 0  |
| Other food sources on private grounds          | 50     | 48 | 1  | 1  | 49    | 47 | 2  | 0  | 48   | 47 | 1  | 0  |
