# Supplementary material for: Bovine viral diarrhea virus in free-ranging wild ruminants in Switzerland: low prevalence of infection despite regular interactions with domestic livestock
Source: PubMed Central journal article supplement (PMC3514304; doi:10.1186/1746-6148-8-204), 2012-10-29
Supplement: 1746-6148-8-204-S7.pdf [file 1746-6148-8-204-S7.pdf]

**Additional file 7: Interactions between Alpine ibex and domestic ruminants.** Numbers refer to the number of game-wardens having reported the corresponding observation, i.e., number of analyzed questionnaires (N) and reported frequency of observations (1: never observed; 2: observed no more than once per year; 3: observed more than once per year).

| IBEX with                                      | CATTLE |    |    |    | SHEEP |    |    |    | GOAT |    |    |    |
|------------------------------------------------|--------|----|----|----|-------|----|----|----|------|----|----|----|
|                                                | N      | 1  | 2  | 3  | N     | 1  | 2  | 3  | N    | 1  | 2  | 3  |
| <b>Proximity between species</b>               |        |    |    |    |       |    |    |    |      |    |    |    |
| Physical contact                               | 35     | 35 | 0  | 0  | 33    | 28 | 4  | 1  | 32   | 27 | 3  | 2  |
| Encounter of less than 50 m                    | 35     | 21 | 10 | 4  | 33    | 9  | 7  | 17 | 32   | 11 | 9  | 12 |
| Encounter of more than 50 m                    | 35     | 16 | 10 | 9  | 33    | 5  | 4  | 24 | 32   | 9  | 5  | 18 |
| Non-simultaneous occupation of the same area   | 35     | 12 | 11 | 12 | 33    | 4  | 5  | 24 | 32   | 10 | 4  | 18 |
| <b>Duration of encounters</b>                  |        |    |    |    |       |    |    |    |      |    |    |    |
| Encounters of less than 50 m for more than 1 h | 35     | 31 | 4  | 0  | 33    | 16 | 11 | 6  | 32   | 18 | 9  | 5  |
| <b>Type of interactions</b>                    |        |    |    |    |       |    |    |    |      |    |    |    |
| Mixing of herds when grazing                   | 35     | 29 | 5  | 1  | 33    | 15 | 9  | 9  | 32   | 17 | 11 | 4  |
| Use of the same natural feeding resources      | 35     | 14 | 13 | 8  | 33    | 4  | 4  | 25 | 32   | 9  | 4  | 19 |
| Use of the same same salt lick                 | 35     | 23 | 8  | 4  | 33    | 8  | 5  | 20 | 32   | 13 | 5  | 14 |
| Use of the same same resting places            | 35     | 30 | 4  | 1  | 33    | 12 | 10 | 11 | 32   | 16 | 5  | 11 |
| <b>Anthropogenic food sources</b>              |        |    |    |    |       |    |    |    |      |    |    |    |
| Wildlife supplemental feeding                  | 45     | 45 | 0  | 0  | 44    | 43 | 1  | 0  | 43   | 43 | 0  | 0  |
| Livestock food sources                         | 45     | 44 | 1  | 0  | 44    | 43 | 1  | 0  | 43   | 42 | 1  | 0  |
| Other food sources on private grounds          | 45     | 45 | 0  | 0  | 44    | 44 | 0  | 0  | 43   | 43 | 0  | 0  |
